# Supplementary material
Source: HighWire-hosted journal article supplement (https://bmjopen.bmj.com/content/10/1/e033156)
Supplement: inline-supplementary-material-1 [file inline-supplementary-material-1.pdf]

**Supplementary File I: Search strategy (PubMed & EMBASE)****#1 Pubmed Search ALL <2000 to November 21, 2019>****Search history sorted by search number ascending**

| # | Searches                                                                                                                                                                                                                                                                                                                                                                                                                                                                                              |
|---|-------------------------------------------------------------------------------------------------------------------------------------------------------------------------------------------------------------------------------------------------------------------------------------------------------------------------------------------------------------------------------------------------------------------------------------------------------------------------------------------------------|
| 1 | (patient-centred care or patient-centered care or community supported models or adherence clubs or teen* club or task shifting or ("community ART" adj2 (distribution or delivery or refill)) or community client lead ART-delivery or facility fast track or quick pick-up or (p?ediatric expedited adj2 ART)).mp. or ((differentiated or decentrali?ed or community) adj2 (care or intervention)).ti,ab,kf. or (adherence club or differentiated model* or down-referr* or out-of-clinic).ti,ab,kf. |
| 2 | exp HIV/ or exp HIV INFECTIONS/ or exp HIV Seropositivity/ or hiv.ti,ab,kf. or (antiretroviral treatment or ART).ti,ab,kf.                                                                                                                                                                                                                                                                                                                                                                            |
| 3 | 1 and 2                                                                                                                                                                                                                                                                                                                                                                                                                                                                                               |

**#2 Embase search <2000 to November 21, 2019>****Search history sorted by search number ascending**

|   |                                                                                                                                                                                                                                                                                                                                                                                                                                                                                                       |
|---|-------------------------------------------------------------------------------------------------------------------------------------------------------------------------------------------------------------------------------------------------------------------------------------------------------------------------------------------------------------------------------------------------------------------------------------------------------------------------------------------------------|
| 1 | (patient-centred care or patient-centered care or community supported models or adherence clubs or teen* club or task shifting or ("community ART" adj2 (distribution or delivery or refill)) or community client lead ART-delivery or facility fast track or quick pick-up or (p?ediatric expedited adj2 ART)).mp. or ((differentiated or decentrali?ed or community) adj2 (care or intervention)).ti,ab,kw. or (adherence club or differentiated model* or down-referr* or out-of-clinic).ti,ab,kw. |
| 2 | exp Human immunodeficiency virus/                                                                                                                                                                                                                                                                                                                                                                                                                                                                     |
| 3 | exp Human immunodeficiency virus infection/                                                                                                                                                                                                                                                                                                                                                                                                                                                           |
| 4 | (hiv or (antiretroviral treatment or ART)).ti,ab,kw.                                                                                                                                                                                                                                                                                                                                                                                                                                                  |
| 5 | 2 or 3 or 4                                                                                                                                                                                                                                                                                                                                                                                                                                                                                           |
| 6 | 1 and 5                                                                                                                                                                                                                                                                                                                                                                                                                                                                                               |
| 7 | limit 6 to (conference abstracts or embase)                                                                                                                                                                                                                                                                                                                                                                                                                                                           |
